# Supplementary material for: A quantitative test of the “Ecomorphotype Hypothesis” for fossil true seals (Family Phocidae)
Source: PeerJ. 2024 Jun 19;12:e17592. doi: 10.7717/peerj.17592 (PMC11193399; doi:10.7717/peerj.17592)
Supplement: Supplemental Information 2 — Data from Churchill & Uhen (2019) and this study. Measurements in millimetres. [file peerj-12-17592-s002.xlsx]

## Sheet: Sheet1
Species	Specimen #	Source	DDDC	HHH	HTL	HTS	LDC	TLH	WDC	WDEH	WDH	WHH	WPDH - width of proximal epiphysis head to deltopectoral crest	WPEH	WTA	WTD	GAP	PIT	DCF	DN	HHF	HPS	ITW	LGTF	LLF	MLF	LMCF	LLCF	WCF	WDEF	WDF	WPEF	WLCF	WMCF
Erignathus barbatus	USNM 16116	Churchill and Uhen 2019	41.7	24	22.6	25.9	79.3	154	33.6	61.8	18.4	30.2	84.2	43.8	26.4	36.5	13.2	4.4	14.5	25	28.8	27.7	60.1	42.3	134.2	143.7	18	29.5	61.3	70.5	34.5	73.5	25.8	20.2
Erignathus barbatus	USNM 269126	Churchill and Uhen 2019	47.9	29.1	27.9	22.7	84.7	158.3	44.7	57.5	22.7	34.9	73.2	54.8	28.7	39	16.2	2.7	13.9	26.3	27.9	27.9	58.3	42.2	125.8	133.4	16.5	26.3	59	69.6	33.6	71.8	25.3	19.8
Erignathus barbatus	USNM 500250	Churchill and Uhen 2019	47.4	28.7	28.8	30.1	87.3	155.6	24.3	66.6	24.3	39.1	80.4	57.9	28.9	44.9	19.3	2.8	16	27.2	27.5	30	64.5	46.3	138.7	137.2	21.5	27.6	61.3	75.7	35.4	79.4	26.2	21.1
Erignathus barbatus	AMNH 19347	Churchill and Uhen 2019	47.1	34.2	29.1	30.9	99.6	171	37.6	66.8	24.4	38.7	86.3	57.9	32.5	42	17.2	3.6	16.4	30.5	30.6	30.8	68.5	42.9	130.9	141.8	24	27	65.7	73.8	35.9	78	28.6	21.5
Erignathus barbatus	AMNH 28	Churchill and Uhen 2019	52	30.3	31.8	29.1	94.3	165.1	49.7	62.3	23	35.5	87.9	58	30.8	42.8	18.6	3.2	18.1	28.6	29	27	70.1	44.5	130.5	135.8	25.6	30	64.4	71.9	36.4	76.7	27.5	21.7
Histriophoca fasciata	USNM 504959	Churchill and Uhen 2019	38.6	24.4	21.5	20	63.2	118.3	30.2	41.7	19.1	28.9	51.7	47.3	22.4	30.4	16.7	1.9	6.6	19.8	20	23.3	46.7	33.4	90.7	96.9	16.9	21.6	42.1	54.3	28.7	52.8	18.7	15.7
Histriophoca fasciata	USNM 504960	Churchill and Uhen 2019	41.5	26.1	20.8	20.5	66.4	112	24.5	40.3	18.9	27.3	53.8	45.4	30.2	31.2	8.1	4.8	5.9	17.4	18.2	23.7	41.3	31.5	84.3	84.2	18.6	26.6	42.4	47.6	25.7	51.5	17.8	16.6
Histriophoca fasciata	USNM 571367	Churchill and Uhen 2019	35.7	24.4	22.5	17.1	60.4	102.1	27.4	41.7	19.4	26.4	50.3	44	25.3	29.6	11.7	2	9.6	16.3	17.1	21.8	44.3	28.6	80.6	85.5	17.5	22.3	41.6	49	28.1	46.8	16.4	15.3
Histriophoca fasciata	AMNH 130246	Churchill and Uhen 2019	36.1	27.3	25.1	19.5	59.4	110.2	26.3	44.3	19.8	31.2	52.5	54.4	27	30.4	15.8	3.1	11.4	17.2	19.5	22.9	43	28.4	86.9	91.3	17.8	22.9	46	53.1	27.7	49.3	18.2	17.8
Histriophoca fasciata	AMNH130245	Churchill and Uhen 2019	44	28.1	22.5	24.1	74	127.9	21.5	45.7	19	30.9	66.8	55	28.1	34.3	13.9	2.4	10.5	19	19.5	22.8	53	35.4	98.5	100.3	19.1	26.6	48.6	57.6	32	58.5	20.1	18.5
Pagophilus groenlandica	USNM 3517	Churchill and Uhen 2019	45.1	25.8	22.1	22	80	123	22.1	43.6	21.2	29.8	58.9	51	26	31.6	18.7	4.6	13	16.4	18.4	23.6	43.9	33	92.7	101.2	22.5	24.2	48.3	58.2	32	55	20.5	18
Pagophilus groenlandica	USNM 21535	Churchill and Uhen 2019	39.9	27.2	22.5	22.5	73.7	118.7	24.8	41.9	19.1	28	58.7	49.9	26	28.7	16.6	3.9	8.2	16.7	17.8	22.2	41.8	30.6	87.2	91.9	21.8	23	44.5	50.6	26.4	49.5	18.6	18.1
Pagophilus groenlandica	USNM 188766	Churchill and Uhen 2019	46.3	27.4	21.6	21.7	73.9	124.3	26.4	50.3	24.2	30.6	59	56.6	25.3	32.2	17.9	5.4	9.4	19	19.4	22.9	47.3	33.5	94	101.2	20.5	25.6	46.9	56.7	33.4	56.5	20.9	15.9
Pagophilus groenlandica	AMNH 180016	Churchill and Uhen 2019	33.5	22.3	19.5	18.4	53.9	87	13.2	43.2	15.2	26.3	50.2	45.5	24.6	31.6	17.2	3.9	11.4	14	17.8	16.4	36	28.2	68.1	67.3	19.4	22.9	44	47.8	20.3	42.9	17.5	16.9
Phoca vitulina	USNM 49911	Churchill and Uhen 2019	35.2	23.5	18.5	21.8	57.9	105.4	27.5	42	16	26.1	48	40.8	21.4	30.4	13.9	3.5	11.8	17.3	19.2	18.1	39.6	26.6	87.5	92.3	17.9	22.3	43.1	50.3	22.7	47	17.8	15.6
Phoca vitulina	USNM 21056	Churchill and Uhen 2019	34.8	26.6	21.5	23.5	59.9	112.6	28.9	42.9	16.3	28.1	46.9	47.4	22.9	27.9	10.4	2.9	9.7	16.1	18.4	18.7	42.3	28	97.6	97.3	18	22.3	41.9	53.6	22	47	17.6	15.6
Phoca vitulina	USNM 15276	Churchill and Uhen 2019	32.5	24	19	18.5	57.5	111.5	25	40.5	17	25.5	49.5	41.5	24	28	8	1.5	6	15.5	17	24.5	33	29	93	96.5	18	21.5	44	54.5	23.5	49.5	17.5	16
Phoca vitulina	USNM 504298	Churchill and Uhen 2019	36.3	25.4	18.7	22.4	64.4	123.3	30.5	42.6	18.1	29.3	49.4	45.2	25.7	30.4	11.2	3.5	9.9	19.1	19.8	20.9	47.5	30.4	98.8	106.3	19.3	22.8	45.6	54	23.3	49.5	19.3	17.2
Phoca vitulina	USNM 504299	Churchill and Uhen 2019	29	20.7	17.2	17.4	42.2	83.5	23.1	35.6	13.5	25.1	41.1	38	20.2	25.7	14	1.9	12.3	15	16.5	15	35	22	71.5	76	15	18	38	43	17	39.5	14	12
Phoca vitulina	AMNH 15900	Churchill and Uhen 2019	27.3	20.7	17	18.1	51.7	85.7	12.1	35.4	13.8	23	41.7	37.7	19.8	26.5	14.7	3.1	11.1	15.2	17.6	16.4	33.8	22.1	74.1	77.5	15.5	19.7	38.1	43.9	19.7	39.3	15.4	12.9
Phoca vitulina	AMNH 232416	Churchill and Uhen 2019	28.5	24	17.2	18.7	56.8	94.7	27.7	36.8	14.3	25.1	48	40.8	22.8	26.4	13.7	3.1	11	16.7	18.9	17.4	38.3	25	81	84.9	15.7	20.3	41.2	44.2	19.4	42.8	16.8	14.3
Phoca vitulina	AMNH 232402	Churchill and Uhen 2019	32.1	21.6	16.6	18.6	58.5	98.8	28.4	39.3	15.1	25.4	44.8	36.9	14.9	23.9	13.9	2.5	10.3	16.4	18.6	20.1	39.4	24.4	86.9	88.9	18.6	22.6	43	47.2	20.8	46.6	18.6	14.8
Phoca vitulina	USNM 250712	Churchill and Uhen 2019	36	20	18.5	18	56	107.5	31.5	42.5	17	25.5	48.5	45	24	29.5	9	1.6	10.5	16.5	17.5	20	41	27.5	94	95.5	18	25	42.5	53	22	49	16.5	16.5
Phoca vitulina	USNM 283568	Churchill and Uhen 2019	33	22.5	17	20	60	111	30.5	42.5	15	27.5	52	44.5	22	30	8	2	9.4	14	17	19	43	26	91	89.5	18	23	42	54	18	47	17	16
Halichoerus grypus	USNM 218323	Churchill and Uhen 2019	50.5	34.4	24.7	26.2	110.5	164.3	38.7	63.1	23.9	41.1	72.4	68.2	27.7	46.7	23.3	3.7	11.7	21.3	26.9	25.3	60	43.3	126.4	125.7	24.7	28.2	58.1	72	33.6	72.7	24.9	21.9
Halichoerus grypus	USNM 446405	Churchill and Uhen 2019	54.1	33.9	27.7	27.8	98.9	164.3	44.4	63.3	28.4	43.1	84	70.3	33.8	48.8	19.5	2.4	11.3	22.3	24.2	26.3	63.7	43.8	132.5	130.1	23.7	28.9	57.1	73.1	36.5	71.1	26	21.4
Halichoerus grypus	USNM 446406	Churchill and Uhen 2019	47.6	30.1	22.7	23.4	92.6	145.3	39.6	57.6	25	32.3	66.4	59.2	26.7	38.6	18.5	2.7	10.9	22.1	22	21.6	53.3	40.9	116.9	116.8	21.5	28.3	51.6	67.9	33.4	63.8	23.9	17.8
Pusa hispida	USNM 16106	Churchill and Uhen 2019	28.5	22.8	19.1	19	59	99.2	25.4	34.7	13.7	27.2	45	39.3	18.5	26.1	11.4	3	9.4	16.8	17.2	17.1	35	25.9	83.8	84.5	16.9	22.2	39.7	48	21.4	43.9	17.7	13.8
Pusa hispida	USNM 7102	Churchill and Uhen 2019	27.8	18.1	15.9	13.7	51.5	88.4	25.6	34.7	13.6	22.5	43.1	34.2	17.8	23.6	13	1.9	8.4	13.5	16.9	16	36.5	24.6	69	72.6	14.7	18.8	34.8	37.5	19.5	40.8	14.1	12
Pusa hispida	USNM 504208	Churchill and Uhen 2019	25.9	21.3	15.5	18.5	57.7	100	30.4	40.3	16.3	25.1	47.6	40.9	19	27.2	12.2	2.6	9	15	17.6	16.9	44.2	29.4	83.9	83.3	14.9	20.9	40.1	46.9	20.7	47.6	17.5	13.4
Pusa sibirica	AMNH 185595	Churchill and Uhen 2019	21.5	14.7	13.8	12.9	39.7	69.2	11.8	31.3	10.7	19.1	36.2	31	16.7	21.9	9	2.4	7.3	10.3	12.3	12.2	27.4	19.4	53.7	53.6	11.2	15.1	31.7	34.8	14.8	30.6	12.5	9.4
Pusa caspica	USNM 341615	Churchill and Uhen 2019	25	17	12	14	51	93	27	31.5	12	18.5	36.5	39	14.5	22	0	2.6	8.1	11.5	12	13	29.5	24	75	74	11.5	14.5	32	38	18	37	14.5	10
Cryptophoca maeotica (cast) - LPB 259	USNM 214979 (cast)	Churchill and Uhen 2019																	9.8	17.6	19.7	21.6	44.6	28.3	90.6	92.1	19.8	23.6	43.8	53.1	26.8	51.4	20	15.5
Leptophoca "amphiatlantica"	USNM 321926	Churchill and Uhen 2019																	11	16.6	16.4	16.5	41	27.4	94.2	93.5	19.1	20	42.6	43.1	18.3	42.2	9.4	17.8
Leptophoca proxima	USNM 559330	Churchill and Uhen 2019																	10.1	16.8	19.9	24	56.7	33.6	106.4	106.6	19.4	23.7	50.6	60.4	28.7	60.2	20.7	14.4
Monachopsis pontica (cast) - LPB 21	USNM 214967 (cast)	Churchill and Uhen 2019																	12.2	15.7	20.2	17.3	34.7	29.2	104.5	104.2	17.7	22.3	43.8	49.3	22.8	49.7	17.9	15.1
Phocanella pumila	USNM 329059	Churchill and Uhen 2019	39.6	24.5	21.8	20.9	79.9	129.1	29.5	49.1	16.8	29.2	57.1	47.5	24.2	32.2	12.4	2.6
Phocanella pumila	USNM 171151	Churchill and Uhen 2019	35.9	21.6	20.1	21.3	76.4	126.4	25.1	39.8	19.3	26.5	61.9	41.5	21.6	29.4	12.1	2.9
Phocanella pumila	USNM 305283	Churchill and Uhen 2019																	13.4	17.2	21.5	24.5	50.8	39.4	115.2	111.4	21.7	26.5	53.7	59.2	29.8	62.4	23	18.8
Phocanella pumila	USNM 329060	Churchill and Uhen 2019																	13.2	17.8	21.9	24.9	46.8	42.2	119.4	113.1	20.1	23.7	52.7	63.8	31.5	64.6	22.3	18.1
Phocanella pumila	USNM 175217	Churchill and Uhen 2019																	11.7	15.2	21.4	22.5	53.6	38.9	110.9	105.9	20.4	24.3	49.5	57.3	27.1	62	20.8	17.7
Phocanella pumila	USNM 181649	Churchill and Uhen 2019																	13.2	18.1	22.9	21.3	52.5	41.9	113.1	108.8	19.4	26.6	50.2	56.2	30.5	60.1	22.2	17.4
Phocanella pumila	USNM 481569	Churchill and Uhen 2019																	12.8	19	19.2	19.4	56.3	33.7	101.2	102.1	18.3	23.4	47.6	56.5	27.1	61.3	20.7	15.9
Pontophoca sarmatica (cast) -LPB 259	USNM 214980 (cast)	Churchill and Uhen 2019																	13.4	16.6	17.9	13.7	33	26.5	76.8	76.8	15.4	16.4	44.6	59.3	27.2	42.2	16.2	14.5
Praepusa vindobonensis (cast) - LPB 158?	USNM 214993 (cast)	Churchill and Uhen 2019																	7.6	9.7	12.4	11.1	23	17.2	56.4	55.4	12.1	12.6	25.2	31.6	15.8	28.6	9.9	9.6
Praepusa? pannonica (cast) - LPB 5?	USNM 214978 (cast)	Churchill and Uhen 2019																	9.7	13.8	16.6	19.9	36.8	25.6	89	90	16.1	18.7	38.2	44.8	22.5	44.8	17.2	13.6
Phoca vitulina vitulina - right	NHMUK 1868.3.21.1	This study	36.67	28.93	22.8	21.06	59.85	116.57	31.21	41.33	18.58	30.75	55.16	48.41	23.99	30.73	12.01	3.91	9.99	18.56	20.49	22.15	35.13	27.62	94.63	99.39	19.31	24.9	46.68	53.64	22.94	48.42	19.63	17.43
Phoca vitulina vitulina - left	NHMUK 1868.3.21.1	This study	35	30.71	21.21	21.31	60.18	117.92	30.91	41.73	17.17	31.18	52.77	48.09	23.68	30.76	10.88	3.23	10.45	19.46	19.67	23.42	38.87	28.53	94.43	98.93	16.28	25.02	45.04	54.15	23.67	48.25	19.56	16.06
Phoca vitulina vitulina - right	NHMUK 329.i	This study	39.59	28.82	21.33	21.24	61.78	115.56	35.02	42.15	18.98	31.76	60.76	50.91	24.92	31.44	12.38	3.47	12.25	20.7	22.99	21.01	37.25	30.28	95.44	99.82	21.17	25.86	47.26	56.95	24.02	50.71	19.95	16.89
Phoca vitulina vitulina - left	NHMUK 329.i	This study																	11.52	20.86	22.3	23.22	41.75	29.94	95.17	99.42	20.43	26.6	47.53	57.02	24.39	50.5	19.99	17.65
Pusa hispida - right	NHMUK 1997.585	This study	34.13	22.23	15.17	17.64	52.13	104.82	27.84	37.03	15.92	24.15	52.16	39.3	19.05	26.56	11.62	2.63
Pusa hispida - left	NHMUK 1997.585	This study	33.28	22.71	14.2	17.11	53.12	103.38	28.51	37.7	15.8	24.83	45.94	40.35	18.89	27.44	9.93	3.21	8.66	16.1	17.18	17.12	33.87	27.67	87.39	87.64	15.38	20.34	40.4	46.91	20.65	44.76	18.8	13.18
Pusa hispida - right	NHMUK 1938.12.10.5	This study	31.03	21.87	15.1	15.68	48.25	100.27	28.14	36.54	13.53	23.32	45.75	37.06	19.12	24.69	12.1	2.9	8.85	14.14	16.85	16.12	36.23	25.35	77.6	81.49	15.25	18.9	37.88	45.46	19.4	43.53	16.25	11.89
Pusa hispida - left	NHMUK 1938.12.10.5	This study	32.02	22.63	14.4	15.15	46.49	100.5	27.1	35.75	14.47	23.61	47.16	37.49	18.98	25.49	11.63	2.74	9.47	13.56	16.77	18.16	32.72	26.22	76.93	80.33	14.79	19.19	38.58	49.04	19.39	44.26	16.86	12.81
Pusa sibirica - right	NHMUK 1965.9.6.2	This study	30.18	18.82	14.61	16.67	48.15	94.9	18.94	36.99	13.32	24.08	39.2	40.3	18.81	25.61	11.58	5.48	10.9	14.94	14.25	17.24	33	23.72	78.07	77.3	12.15	15.03	37.51	40.07	17.92	40.34	16.99	14.35
Pusa sibirica - left	NHMUK 1965.9.6.2	This study	30.76	18.52	13.67	15.3	48.51	95.83	18.7	36.92	15.1	24.43	46.33	39.89	17.63	35.56	10.87	5.02	9.97	14.35	15.85	17.09	34.97	23.28	78.7	78.38	12.95	17.66	37.49	42.15	19.11	40.49	15.59	13.78
Pusa sibirica - right	NHMUK 1960.12.21.1	This study	22.16	14.72	12.69	13.08	34.89	66.86	19.43	30.06	10.41	18.07	34.19	29.24	15.87	20.05	7.83	3.7	8.98	10.71	12.53	11.57	24.71	19.29	51.72	54.37	12.21	13.56	31.92	29.06	14.49	29.4	13.87	8.43
Pusa sibirica - left	NHMUK 1960.12.21.1	This study	20.57	13.07	11.53	14.17	30.64	67.41	19.09	29.97	10.18	18.35	34.22	28.83	18.09	21.76	8.52	4.13	7.69	10.72	12.15	12.96	24.73	20.74	54.86	53.77	11.25	13.57	31.02	33.79	14.9	29.82	14.47	11.62
Pusa sibirica - right	NHMUK 1965.9.6.1	This study	25.13	15.17	14.57	14.96	41.27	92.82	20.22	31.84	12.34	20.58	41.59	33.17	16.94	23.7	9.39	2.26	9.35	11.01	12.45	13.91	29.9	22.64	72.4	73.17	12.76	14.82	31.99	39.46	15.93	37.91	15.97	9.28
Pusa sibirica - left	NHMUK 1965.9.6.1	This study	24.14	16.19	13.13	14.96	42.37	92.57	23.7	32.27	12.59	20.58	40.08	31.59	16.17	22.04	10.47	5.43	8.23	10.79	12.49	16.21	29.45	22.61	72.81	74.2	12.68	15.53	32.82	38.04	15.2	37.08	14.42	10.32
Histriophoca fasciata - right	NHMUK 1966.12.7.2	This study	46.89	27.66	21.41	23.43	53.71	121.01	24.35	43.93	23.97	32.93	59.38	49.75	31.87	31.5	15.4	5.28	11.75	21.21	20.81	19.8	45.35	30.02	87.81	92.35	17.65	25.04	46.74	52.97	31.14	49.7	20.64	14.5
Histriophoca fasciata - left	NHMUK 1966.12.7.2	This study	45.76	27.72	17.82	23.7	55.03	123.48	22.82	45.61	21.67	32.28	60.2	50.52	30.62	33.15	16.54	4.66	11.15	20.87	21.26	17.5	40	30.68	89.45	93.54	17.24	25.08	47.82	52.14	32.89	49.32	22.35	16.63
Pagophilus groenlandica - right	NHMUK 1846.6.18.3	This study	44.43	26.48	22.32	23.73	75.37	129.1	42.49	43	22.06	28.05	63.9	48.83	26.56	31.41	18.61	3.39	10.11	17.9	18.76	19.04	36.94	32.52	90.38	89.08	21.07	22.57	45.14	47.38	28.43	50.02	18.51	15.71
Pagophilus groenlandica - left	NHMUK 1846.6.18.3	This study	43.84	26.91	21.7	21.45	73.55	126.79	43.38	42.79	21.53	28.31	59.98	48.42	24.11	33.59	17.91	3.93	9.35	17.92	18.94	22.24	41.05	32.83	89.17	89.26	19.54	24.3	45.02	48.95	30.23	48.89	18.53	16.42
Pagophilus groenlandica - right	NHMUK 1938.12.10.1	This study	50.08	27.28	24.42	21.23	69.59	127.54	45.46	43.17	25.48	31.92	54.27	55.43	29.99	31.68	18.72	5.31	10.09	18	21.01	24.74	44.82	32.42	101.69	99.76	21.6	24.04	50.44	60.05	33.72	54.68	20.85	20.62
Pagophilus groenlandica - left	NHMUK 1938.12.10.1	This study	50.03	27.93	24.57	21.77	71.06	126.78	36.99	42.74	26.03	31.19	58.97	53.98	27.88	31.91	16.49	5.32	10.01	18.19	20.99	24.86	44.09	32.88	102.43	99.18	22.09	26.59	49.8	60.23	33.69	54.77	20.73	19.07
Pagophilus groenlandica - right	NHMUK 1951.11.28.2	This study	44	27.81	24.73	22.7	65.79	117.01	33.39	43.55	20.34	31.3	61.7	54.12	26.45	30.17	18.17	5.28	11.22	17.42	19.97	18.86	47.78	34.51	90.34	91.64	22.76	23.97	50.21	59.75	30.46	53.45	21.28	17.38
Pagophilus groenlandica - left	NHMUK 1951.11.28.2	This study	42.19	28.63	23.69	25	68.17	116.83	32.26	43.61	20.88	31.22	59.25	52.94	26.96	30.23	16.16	4.96	11.38	18.14	19.85	19.67	47.5	34.25	89.02	89.55	20.27	25.69	49.8	56.57	31.71	52.68	20.89	18.24
Halichoerus grypus - right	NHMUK 2003.361	This study	52.12	34.66	25.98	28.23	89.46	151.96	44.25	56.3	28.66	43.04	69.38	64.95	34.1	43.97	14.57	7.95	10.26	22.81	25.51	25.05	61.94	41.54	116.49	123.94	24.67	28.14	56.21	67.84	38.93	65.9	25.1	19.7
Halichoerus grypus - left	NHMUK 1938.3.12.1	This study	40.82	28.66	21.42	25.61	72.85	135.47	39.71	45.66	21.7	36.19	61.41	57.34	29.79	38.13	17.7	6.63	10.19	18.36	21.26	24.8	52.88	36.11	102.63	104.19	19.74	25.4	51.05	59.03	30.45	58.08	23.23	17.16
Halichoerus grypus - left	NHMUK 1956.9.26.1	This study	41.05	26.73	18.79	23.52	78.24	140.03	33	50.31	22.51	33.6	61.57	55.33	24.93	38.56	21.04	4.63	9.38	16.5	20.88	19.43	40.45	34.81	106.2	104.4	19.02	24.05	47.88	58.29	30.42	57.11	20.9	17.51
Halichoerus grypus - left	NHMUK 1956.9.26.4	This study	47.67	31.15	18.92	25.28	80.93	151.49	28.63	55.27	28.88	38.88	66.68	62.48	31.32	39.44	16.75	5.18	12.08	22.92	23.19	22.3	49.77	36.78	108.94	114.3	20.9	26.97	53.59	55.93	35.23	61.07	23.75	17.99
Halichoerus grypus - left	NHMUK 1962.3.6.1	This study	53.02	31.9	22.63	25.38	78	146.69	36.63	54.96	26.22	37.2	71.48	65.49	31.38	42.02	18.55	5.67	9.49	18.58	24.33	23.81	45.44	37.37	108.77	114.37	22.98	27.98	56.75	72.84	34.16	61.12	26.11	20.82
Halichoerus grypus - right	NHMUK 1951.11.28.1	This study	40.15	26.34	17.89	20.79	68.06	128.55	33.27	49.55	24.97	33.5	64.18	54.36	30.25	34.53	12.84	4.42	10.97	19.49	20.5	19.14	45.6	33.2	93.88	101.14	18.4	20.69	47.81	61.74	32.64	56.37	21.39	15.88
Halichoerus grypus - left	NHMUK 1951.11.28.1	This study	45.82	25.42	20.69	22.39	61.02	129.47	32.66	47.86	23.89	34.68	58.26	54.55	26.38	35.91	16.52	5.42	10.19	19.07	20.71	22.07	46.61	34.19	93.24	101.71	18.79	24.6	48.25	63.53	31.95	55.38	21.64	16.13
Halichoerus grypus - right	NHMUK 1956.9.26.2	This study	49.3	32.09	22.19	26.77	77.46	149.5	40.35	58.34	28.48	37.94	71.89	62.44	32.17	40.7	17.07	7.88	8.76	22.53	24.45	20.65	52.01	41.66	114.64	118.87	24.25	27.55	54.82	67.52	33.71	62.52	25.95	18.79
Erignathus barbatus - right	NHMUK 1887.9.28.1	This study	47.35	31.19	24.87	28.49	75.32	152.61	46.18	63.15	23.67	34.94	74.3	55.93	28.48	39.41	15.78	7.19	15.47	28.4	30.55	32.07	58.37	45.15	132.96	137.18	27.63	29.71	64.12	76.57	34.85	75.32	26.72	21.59
Erignathus barbatus - left	NHMUK 1887.9.28.1	This study	51.37	31.15	25.81	27.62	77.66	157	38.7	63.01	24.79	34.33	74.38	56.63	28.87	43.98	12.97	6.46	14.98	28.57	31.19	31.53	58.98	46.12	133.51	134.91	22.39	29.29	62.79	77.15	35.9	72.34	27.23	22.43
Phoca largha - right	NMNS M62796	This study	35	26.42	18.97	18.66	65.37	120.75	32.86	43.23	20.42	30.17	51.96	46.25	23.28	33.03	8.08	4.9	11.29	18.84	20.33	23.34	34.85	32.41	94.42	99.73	19.25	22.91	48.13	59.56	25.82	53.08	19.63	17.96
Mesotaria ambigua - cast - right	NHMUK PV M1163	This study																	21.5	35.56	35.57	32.51	56.88	46.82	131.66	147.84	27.12	36.83	75.44	85.9	51.31	76.71	29.5	23.36
Phocanella pumila - cast - right	NHMUK PV M1199	This study	33.22	22.08	15.31	18.2	60.94	116.84	24.33	41.25	14.34	25.22	51.59	41.15	22.57	29.42	14.71	6.41
Phocanella minor - cast - right	NHMUK PV M1206	This study	24.34	20.45	14.71	14.21	49.27	96.98	16.55	33.23	12.38	21.61	39.61	35.08	18.56	20.64	9.7	4.23
Phocanella minor - cast - left	NHMUK PV M1208	This study																	10.64	13.7	16.77	NA	27	25.16	73.27	73.11	12.93	16.02	37.87	41.47	26.56	40.91	15.48	10.58
Nanophoca vitulinoides - cast - left	NHMUK PV M1212	This study	20.96	19.64	11.22	13.71	38.34	79.51	15.44	26.96	10.44	21.46	32.26	30.37	13.52	20.42	6.09	3.85
Nanophoca vitulinoides - cast left	NHMUK PV M1216	This study																	7.93	13.81	14.65	14.91	25.33	20.99	68.88	67.83	13.33	14.82	33.7	41.18	19.94	36.27	12.73	11.58
